# Supplementary material for: Melanoma in the United States, 2010–2021: National Trends and State-Level Patterns
Source: Research Square preprint supplement (doi:10.21203/rs.3.rs-7935393/v1), 2025-10-30
Supplement: Supplementary file 1 [file 2043a7898141ec69a463ef59.docx]

**Supplementary File 1**

SUPPLEMENTARY METHODS

**Overview**

**The methods used in this study follow the general analytic framework of the GBD 2021 study [1, 2]. The GBD 2021 study provides a comprehensive and up-to-date analysis of the global burden of 371 diseases and injuries across 204 countries and 811 subnational locations from 1990 to 2021. Additional details are available on the Global Health Data Exchange (GHDx) GBD 2021 website. In the present analysis, we estimated the number of cases and age-standardized rates of melanoma incidence, mortality, prevalence, and disability-adjusted life years (DALYs) from 2010 to 2021 by age and sex in the United States and its 51 jurisdictions, including all 50 states and the District of Columbia.**

**Case Definition**

Melanoma was identified using ICD-10 code C43. Cases were included if melanoma was recorded in at least one inpatient or outpatient encounter within the GBD 2021 data sources.

**GBD Data Inputs and Sources**

Data were obtained from the University of Washington Institute for Health Metrics and Evaluation, which hosts the GBD 2021 database. The data for this study is covering melanoma prevalence, mortality, and disability-adjusted life years (DALYs) from 2010 to 2021. DALY integrates healthy life years lost due to both premature mortality and living with disability. The GBD study gathers global health data through a comprehensive methodology that includes systematic literature reviews, medical records, insurance claims, and national health surveys [1]. A full list of the data input resources used to estimate health outcomes from melanoma can be downloaded from the Sources Tool of GHDx.

**Health Metrics and Modeling Approaches**

The GBD estimation process involves data collection and adjustments, estimation of all indicators by using specific modeling strategies, model validation and adjustment of results. Detailed descriptions have been reported in the GBD capstone publications [1, 2]. Meta-regression-Bayesian, regularized, trimmed (MR-BRT) was used to adjust the uncertainty in the collected data and observations with greater uncertainty were given less weight in the model.

**Estimates of prevalence, incidence, years lived with disability, mortality, and years of life lost**

**Melanoma incidence and survival were used to estimate the 10-year prevalence. Total prevalence was distributed into four sequelae reflecting varying degrees of disability: (i) diagnosis and treatment, (ii) remission, (iii) metastatic and (iv) terminal. Spatiotemporal Gaussian process regression (ST-GPR) was the primary method for estimates of the prevalence over time, age, and location [1]. ST-GPR is a set of regression methods that analyses heterogeneous and incomplete data requiring statistical smoothing while it may not fully capture complex and high-non-stationary dynamics in spatiotemporal data perfectly and the complexity of model selection and hyperparameter optimization may increase with the amount of input data [3]. Years lived with disability (YLDs) were calculated by multiplying the prevalent counts of sequelae by their respective disability weights, for melanoma. DALYs were calculated by summing YLDs and YLLs.**

The Cause of Death Ensemble model (CODEm) developed specifically for GBD was used to estimate the mortality of melanoma. It estimated deaths by location, age, sex and year by combining the results through an ensemble of statistical models and systematically testing combinations of covariates for out-of-sample predictive validity [1]. CODEm has a diverse pool of models to optimize algorithms, predictive validity tests while many other modeling strategies are also possible and it takes long time to process the data for each model [4]. Years of life lost (YLLs) were calculated by multiplying deaths due to melanoma by the standard life expectancy at the age that death occurred.

**Socio-demographic Index**

**The Socio-demographic Index (SDI) is a composite measure developed by the Global Burden of Disease (GBD) study to capture the social and economic development of a population. It is calculated based on three key indicators: average income per capita, mean years of education among individuals aged 15 and older, and total fertility rate under the age of 25. SDI values range from 0 to 1, with higher values indicating greater socio-demographic development. In burden of disease analyses, SDI is commonly used to categorize countries or regions into five groups—low, lower-middle, middle, upper-middle, and high SDI—to assess health outcomes in the context of development level and identify disparities in disease burden and access to healthcare.**

**Methodological Strengths and Limitations**

*Strengths*

• Comprehensive dataset: The GBD study integrates multiple high-quality data sources for robust disease burden estimates.

• Standardized methodology: ASPR, ASIR, and ASDR allow for fair comparisons over time and across geographic locations.

• Advanced statistical modeling: The DisMod-MR 2.1 model corrects for biases and missing data, improving estimate reliability.

• Uncertainty quantification: Monte Carlo simulations provide rigorous confidence intervals for all estimates.

*Limitations*

• Potential underestimation in older adults: Older individuals may have lower Melanoma diagnosis rates, leading to an underestimated burden.

• Variability in data sources: Differences in healthcare access, diagnostic criteria, and case definitions across states may introduce regional variations.

• Lack of severity stratification: The GBD framework does not differentiate between staging information for the cases, limiting insights into treatment needs

**The Guidelines for Accurate and Transparent Health Estimates Reporting (GATHER) checklist**

| **#** | **Checklist item** | **Reference** |
| --- | --- | --- |
| **Objectives and funding** | | |
| **1** | Define the indicator(s), populations (including age, sex, and geographic entities), and  time period(s) for which estimates were made. | Methods/ Supplementary methods - overview |
| **2** | List the funding sources for the work. | No funding |
| **Data Inputs** | | |
| *For all data inputs from multiple sources that are synthesized as part of the study:* | | |
| **3** | Describe how the data were identified and how the data were accessed. | Methods/ Supplementary methods - overview |
| **4** | Specify the inclusion and exclusion criteria. Identify all ad‐hoc exclusions. | Supplementary methods – case definition |
| **5** | Provide information on all included data sources and their main characteristics. For each data source used, report reference information or contact name/institution, population represented, data collection method, year(s) of data collection, sex and age range,  diagnostic criteria or measurement method, and sample size, as relevant. | All are available via <https://vizhub.healthdata.org/gbd-results/> |
| **6** | Identify and describe any categories of input data that have potentially important biases  (e.g., based on characteristics listed in item 5). | Methods/ Supplementary methods - GBD Data Inputs and Sources |
| *For data inputs that contribute to the analysis but were not synthesized as part of the study:* | | |
| **7** | Describe and give sources for any other data inputs. | Available via <https://vizhub.healthdata.org/gbd-results/> |
| *For all data inputs:* | | |
| **8** | Provide all data inputs in a file format from which data can be efficiently extracted (e.g., a spreadsheet rather than a PDF), including all relevant meta‐data listed in item 5. For any data inputs that cannot be shared because of ethical or legal reasons, such as third‐party ownership, provide a contact name or the name of the institution that retains the right to  the data. | It has been uploaded as a spreadsheet and is available via <https://vizhub.healthdata.org/gbd-results/> |
| **Data analysis** | | |
| **9** | Provide a conceptual overview of the data analysis method. A diagram may be helpful. | Flow diagrams of the overall  methodological processes are  available online (<https://vizhub.healthdata.org/gbd-results/> ) |
| **10** | Provide a detailed description of all steps of the analysis, including mathematical formulae. This description should cover, as relevant, data cleaning, data pre‐processing, data adjustments and weighting of data sources, and mathematical or statistical  model(s). | Methods/ Supplementary methods |
| **11** | Describe how candidate models were evaluated and how the final model(s) were  selected. | Supplementary methods - Estimates of prevalence, incidence, years lived with disability, mortality, and years of life lost |
| **12** | Provide the results of an evaluation of model performance, if done, as well as the results  of any relevant sensitivity analysis. | Supplementary methods - Estimates of prevalence, incidence, years lived with disability, mortality, and years of life lost |
| **13** | Describe methods for calculating uncertainty of the estimates. State which sources of  uncertainty were, and were not, accounted for in the uncertainty analysis. | Methods – Statistical analysis |
| **14** | State how analytic or statistical source code used to generate estimates can be accessed. | Methods – Statistical analysis |
| **Results and Discussion** | | |
| **15** | Provide published estimates in a file format from which data can be efficiently extracted. | Results/ visualization tools named in Methods/ <https://vizhub.healthdata.org/gbd-results/> |
| **16** | Report a quantitative measure of the uncertainty of the estimates (e.g. uncertainty  intervals). | Methods – Statistical analysis |
| **17** | Interpret results in light of existing evidence. If updating a previous set of estimates,  describe the reasons for changes in estimates. | Discussion |
| **18** | Discuss limitations of the estimates. Include a discussion of any modelling assumptions or  data limitations that affect interpretation of the estimates. | Discussion/ Supplementary methods - Methodological Strengths and Limitations |

1. Ferrari AJ, Santomauro DF, Aali A, Abate YH, Abbafati C, Abbastabar H, et al. Global incidence, prevalence, years lived with disability (YLDs), disability-adjusted life-years (DALYs), and healthy life expectancy (HALE) for 371 diseases and injuries in 204 countries and territories and 811 subnational locations, 1990–2021: a systematic analysis for the Global Burden of Disease Study 2021. The Lancet. 2024;403(10440):2133-61.

2. Naghavi M, Ong KL, Aali A, Ababneh HS, Abate YH, Abbafati C, et al. Global burden of 288 causes of death and life expectancy decomposition in 204 countries and territories and 811 subnational locations, 1990–2021: a systematic analysis for the Global Burden of Disease Study 2021. The Lancet. 2024;403(10440):2100-32.

3. Saad F, Burnim J, Carroll C, Patton B, Köster U, A. Saurous R, et al. Scalable spatiotemporal prediction with Bayesian neural fields. Nature Communications. 2024;15(1):7942.

4. Foreman KJ, Lozano R, Lopez AD, Murray CJ. Modeling causes of death: an integrated approach using CODEm. Population health metrics. 2012;10:1-23.
