# Supplementary material for: Melanoma in the United States, 2010–2021: National Trends and State-Level Patterns
Source: Research Square preprint supplement (doi:10.21203/rs.3.rs-7935393/v1), 2025-10-30
Supplement: Supplementary file 2 [file ef30ca1a83504dea45a855b9.docx]

**Supplementary File 2**

**Data collection:**

We collected state-level data on racial composition, ultraviolet (UV) exposure, rural population percentage, and dermatologist workforce through publicly accessible and reputable online sources. Racial distribution for each state was retrieved from the Kaiser Family Foundation (KFF) 2021 estimates, which are based on U.S. Census data [1]. Sun exposure metrics for 2020, including UV irradiance, percentage of sunshine, total annual sunlight hours, and number of clear days, were extracted from two environmental databases that aggregate data from the National Climatic Data Center and the World Data Center for Meteorology [2, 3]. UV irradiance was defined as the annual average daily UV radiation (J/m²). The % Sun figure represents the proportion of daylight hours during which direct sunlight reaches the ground. “Total Hours” refers to average annual sunlight hours, while “Clear Days” indicates the number of days per year with no more than 30% cloud cover during daylight. Estimates of rurality (i.e., the proportion of the state population living in rural areas) were drawn from America’s Health Rankings 2023 dataset, which compiles data from the U.S. Census and other governmental sources [4]. Although these data were from 2023 rather than 2021, the relative stability of rural population percentages across this period (e.g., 19.9% in 2021 vs. 20.4% in 2023) supports their use. State-level employment of dermatologists and their location quotients were obtained from the U.S. Bureau of Labor Statistics (BLS) for 2023, as the 2021 dataset contained extensive missing values[5]. Location quotient (LQ) is a measure of workforce concentration, representing the ratio of the state-level prevalence of dermatologists relative to the national average. Additionally, median age data for each state were retrieved from Statista's 2021 estimates, sourced from the U.S. Census Bureau, to evaluate demographic age-related trends in relation to melanoma incidence.

| **State** | **Race** | | | | | | | **Sun exposure** | | | | **Rural area (%)** | **Employment of Dermatologists** | |
| --- | --- | --- | --- | --- | --- | --- | --- | --- | --- | --- | --- | --- | --- | --- |
| **White** | **Black** | **Hispanic** | **Asian** | **American Indian or Alaska Native** | **Native Hawaiian or Pacific Islander** | **Multiple Races** | **UV Irradiance (J/M2)** | **% Sun** | **Total hours** | **Clear Days** | **Number** | **Location quotient** |
| Alabama | 0.644 | 0.255 | 0.047 | 0.013 | 0.004 | NA | 0.037 | 4092 | 58 | 2641 | 99 | 42 | 200 | 1.26 |
| Alaska | 0.579 | 0.026 | 0.067 | 0.07 | 0.138 | 0.015 | 0.105 | 1957 | 41 | 2061 | 61 | 35.1 | NA | NA |
| Arizona | 0.521 | 0.041 | 0.324 | 0.033 | 0.033 | 0.002 | 0.047 | 4931 | 85 | 3806 | 193 | 11.5 | 290 | 1.18 |
| Arkansas | 0.683 | 0.144 | 0.083 | 0.014 | 0.004 | 0.004 | 0.068 | 4103 | 61 | 2771 | 123 | 43.9 | 260 | 2.59 |
| California | 0.342 | 0.051 | 0.403 | 0.151 | 0.002 | 0.003 | 0.047 | 4541 | 68 | 3055 | 146 | 5.8 | 700 | 0.49 |
| Colorado | 0.653 | 0.036 | 0.222 | 0.031 | 0.003 | 0.002 | 0.053 | 4474 | 71 | 3204 | 136 | 14.4 | 280 | 1.27 |
| Connecticut | 0.628 | 0.097 | 0.178 | 0.047 | 0.001 | NA | 0.049 | 3100 | 56 | 2585 | 82 | 13.8 | NA | NA |
| Delaware | 0.595 | 0.203 | 0.102 | 0.041 | NA | NA | 0.057 | 3512 | NA | NA | 97 | 17.9 | 30 | 0.94 |
| District of Columbia | 0.359 | 0.431 | 0.115 | 0.038 | NA | NA | 0.055 | NA | NA | NA | NA | NA | NA | NA |
| Florida | 0.512 | 0.144 | 0.27 | 0.028 | 0.001 | 0 | 0.046 | 4596 | 66 | 2927 | 101 | 9.1 | 2000 | 2.63 |
| Georgia | 0.503 | 0.303 | 0.1 | 0.043 | 0.002 | 0 | 0.048 | 4168 | 66 | 2986 | 112 | 26.6 | 230 | 0.62 |
| Hawai | 0.196 | 0.013 | 0.109 | 0.375 | NA | 0.097 | 0.209 | 4793 | 71 | NA | 90 | 14 | NA | NA |
| Idaho | 0.788 | 0.007 | 0.133 | 0.014 | 0.007 | 0.001 | 0.051 | 3604 | 64 | 2993 | 120 | 30.8 | 50 | 0.76 |
| Illinois | 0.59 | 0.132 | 0.181 | 0.057 | 0.001 | 0 | 0.039 | 3615 | 56 | 2567 | 95 | 13.2 | 370 | 0.77 |
| Indiana | 0.767 | 0.086 | 0.077 | 0.023 | 0.001 | NA | 0.045 | 3486 | 55 | 2440 | 88 | 28.9 | 330 | 1.31 |
| Iowa | 0.831 | 0.034 | 0.067 | 0.023 | 0.003 | 0.001 | 0.041 | 3254 | 59 | 2691 | 105 | 37.3 | NA | NA |
| Kansas | 0.734 | 0.047 | 0.129 | 0.03 | 0.004 | NA | 0.056 | 4077 | 65 | 2922 | 128 | 28.2 | 60 | 0.51 |
| Kentucky | 0.83 | 0.068 | 0.038 | 0.015 | 0.002 | NA | 0.047 | 3733 | 56 | 2514 | 93 | 41.6 | 290 | 1.86 |
| Louisiana | 0.574 | 0.306 | 0.055 | 0.018 | 0.004 | NA | 0.044 | 4242 | 57 | 2649 | 101 | 29.1 | NA | NA |
| Maine | 0.9 | 0.014 | 0.018 | 0.011 | 0.003 | NA | 0.053 | 2937 | 57 | 2513 | 101 | 61.5 | NA | NA |
| Maryland | 0.481 | 0.286 | 0.111 | 0.068 | 0.001 | 0 | 0.052 | 3503 | 57 | 2582 | 105 | 14.7 | NA | NA |
| Massachusetts | 0.677 | 0.061 | 0.129 | 0.069 | 0.001 | NA | 0.063 | 3002 | 58 | 2634 | 98 | 8.9 | 630 | 2.2 |
| Michigan | 0.731 | 0.131 | 0.056 | 0.032 | 0.003 | 0 | 0.048 | 3021 | 51 | 2392 | 71 | 27.1 | 500 | 1.46 |
| Minnesota | 0.769 | 0.067 | 0.058 | 0.05 | 0.006 | NA | 0.049 | 3003 | 58 | 2711 | 95 | 28.9 | 420 | 1.83 |
| Mississippi | 0.559 | 0.357 | 0.031 | 0.008 | 0.004 | NA | 0.04 | 4068 | 61 | 2720 | 111 | 54.4 | NA | NA |
| Missouri | 0.768 | 0.106 | 0.046 | 0.02 | 0.002 | 0.001 | 0.057 | 3742 | 60 | 2690 | 115 | 30.8 | NA | NA |
| Montana | 0.838 | 0.004 | 0.043 | 0.007 | 0.055 | NA | 0.054 | 3209 | 59 | 2698 | 82 | 47.1 | 140 | 3.55 |
| Nebraska | 0.766 | 0.042 | 0.12 | 0.022 | 0.006 | NA | 0.044 | 3663 | 61 | 2762 | 117 | 28.1 | 60 | 0.77 |
| Nevada | 0.451 | 0.086 | 0.301 | 0.084 | 0.006 | 0.007 | 0.066 | 4419 | 79 | 3646 | 158 | 6.2 | 230 | 1.94 |
| New Hampshire | 0.876 | 0.012 | 0.043 | 0.027 | NA | NA | 0.043 | 2921 | 54 | 2519 | 90 | 42.4 | 50 | 1.01 |
| New Jersey | 0.522 | 0.121 | 0.216 | 0.1 | 0.001 | 0 | 0.04 | 3264 | 56 | 2499 | 94 | 6.3 | NA | NA |
| New Mexico | 0.348 | 0.016 | 0.503 | 0.014 | 0.081 | NA | 0.037 | 4797 | 76 | 3415 | 167 | 24.7 | NA | NA |
| New York | 0.535 | 0.132 | 0.196 | 0.087 | 0.002 | 0 | 0.048 | 3002 | 46 | 2120 | 63 | 12.9 | 1180 | 1.58 |
| North Carolina | 0.611 | 0.197 | 0.101 | 0.031 | 0.009 | 0 | 0.05 | 4025 | 60 | 2651 | 109 | 33.3 | 310 | 0.81 |
| North Dakota | 0.827 | 0.029 | 0.039 | 0.014 | 0.043 | NA | 0.044 | 3041 | 59 | 2738 | 93 | 39.3 | NA | NA |
| Ohio | 0.767 | 0.115 | 0.043 | 0.024 | 0.001 | 0.001 | 0.049 | 3384 | 50 | 2183 | 72 | 24 | 310 | 0.71 |
| Oklahoma | 0.629 | 0.065 | 0.119 | 0.023 | 0.069 | 0.001 | 0.093 | 4248 | 68 | 3089 | 139 | 35.8 | NA | NA |
| Oregon | 0.721 | 0.018 | 0.14 | 0.045 | 0.007 | 0.004 | 0.065 | 3607 | 48 | 2341 | 68 | 19.7 | 200 | NA |
| Pennsylvania | 0.739 | 0.097 | 0.084 | 0.037 | 0.001 | NA | 0.043 | 3257 | 58 | 2614 | 87 | 23.6 | 320 | 0.68 |
| Rhode Island | 0.689 | 0.043 | 0.174 | 0.03 | 0.002 | NA | 0.06 | 3084 | 58 | 2606 | 98 | 9.7 | 50 | 1.25 |
| South Carolina | 0.628 | 0.247 | 0.063 | 0.016 | 0.002 | NA | 0.043 | 4051 | 64 | 2826 | 115 | 31.8 | 30 | 0.18 |
| South Dakota | 0.802 | 0.02 | 0.04 | 0.015 | 0.076 | NA | 0.045 | 3284 | 63 | 2947 | 104 | 42.3 | NA | NA |
| Tennessee | 0.723 | 0.151 | 0.06 | 0.017 | 0.001 | NA | 0.048 | 3859 | 56 | 2510 | 102 | 34.7 | 210 | 0.83 |
| Texas | 0.393 | 0.114 | 0.404 | 0.052 | 0.002 | 0.001 | 0.035 | 4529 | 61 | 2850 | 135 | 17 | 730 | 0.68 |
| Utah | 0.76 | 0.01 | 0.147 | 0.025 | 0.006 | 0.008 | 0.044 | 4314 | 66 | 3029 | 125 | 10.8 | NA | NA |
| Vermont | 0.906 | 0.011 | 0.02 | 0.018 | NA | NA | 0.044 | 2873 | 49 | 2295 | 58 | 66.1 | NA | NA |
| Virginia | 0.595 | 0.177 | 0.102 | 0.068 | 0.002 | 0.001 | 0.056 | 3937 | 63 | 2829 | 100 | 24.9 | 150 | 0.48 |
| Washington | 0.646 | 0.037 | 0.136 | 0.094 | 0.007 | 0.006 | 0.073 | 3117 | 47 | 2170 | 58 | 16.6 | 180 | 0.65 |
| West Virginia | 0.906 | 0.025 | 0.017 | 0.008 | NA | NA | 0.043 | 3484 | NA | NA | 60 | 55.2 | 70 | 1.37 |
| Wisconsin | 0.793 | 0.058 | 0.075 | 0.03 | 0.005 | NA | 0.039 | 3005 | 54 | 2428 | 89 | 33.6 | 210 | 0.94 |
| Wyoming | 0.813 | 0.009 | 0.106 | 0.007 | 0.017 | NA | 0.048 | 3720 | 68 | 3073 | 114 | 37.4 | NA | NA |

**Supplementary Table 1.** Collected data of each state regarding race, sun exposure, rural area percentage, and dermatology access

**Statistical analysis:**

We assessed the association between age-standardized melanoma incidence and each of the following state-level variables: percentage of population by race (White, Black, Asian, Hispanic, American Indian or Alaska Native, Native Hawaiian or Pacific Islander, and Multiple Races), median age, UV irradiance (J/m²), rural population percentage, number of employed dermatologists, and dermatologist location quotient. Prior to correlation analysis, the distribution of each variable was evaluated for normality using the Shapiro–Wilk test. Variables meeting normality assumptions were analyzed using Pearson’s correlation coefficient, while variables with non-normal distributions were analyzed using Spearman’s rank correlation coefficient. Each correlation was reported with its corresponding r value and two-tailed p-value, with p < 0.05 considered statistically significant. Analyses and visualizations (scatterplots with fitted regression or monotonic trend lines) were conducted in Python (v3.10) using the SciPy and Seaborn packages.

**Results:**

Correlation analysis identified several demographic and structural factors significantly associated with state-level melanoma incidence. Among racial composition variables, a higher percentage of the White population demonstrated a moderate positive correlation with incidence (r = 0.502, p < 0.001). In contrast, the percentage of the Black population showed a moderate-to-strong negative correlation (r = –0.591, p < 0.001). Other racial groups, including Hispanic, Asian, American Indian/Alaska Native, Native Hawaiian/Pacific Islander, and individuals identifying as multiple races, exhibited weak and statistically non-significant associations. Median state-level age was weakly but significantly correlated with melanoma incidence (r = 0.277, p = 0.049), suggesting that states with older populations tend to have slightly higher incidence rates. Dermatologist workforce size demonstrated a moderate negative correlation with incidence (r = –0.374, p = 0.032), while location quotient was not significantly associated. UV irradiance and rural population percentage showed weak, non-significant relationships with melanoma incidence. Scatterplot visualizations supported these patterns, with the most consistent trends observed for racial composition, median age, and dermatologist workforce (Supplementary Figures 2-13).

Given the exploratory nature of these analyses, no multiple-comparison correction was applied; p < 0.05 results should be interpreted cautiously.

Please note that for supplementary Figures 2-13, we divided them into two sections. For variables with statistically significant correlations, scatterplots include fitted trend lines; for non-significant findings, scatterplots are presented without trend lines.

| **Supplementary Table 2:** Pearson Correlation Between Age-Standardized Melanoma Incidence and State-Level Demographic, Environmental, and Structural Factors in the United States (2020, 2021, 2023) † | | | |
| --- | --- | --- | --- |
| **Variable** | **R** | **P-value** | **Strength & Direction** |
| **Demographic Factors** |  |  |  |
| **Median Age** | 0.277 | **0.049*** | Weak positive correlation |
| **Race** (% of total state population) |  |  |  |
| White | 0.502 | **<0.001*** | Moderate positive correlation |
| Black | -0.591 | **<0.001*** | Moderate-to-strong negative correlation |
| Hispanic | 0.018 | 0.899 | No significant association |
| Asian | -0.145 | 0.309 | No significant association |
| American Indian/Alaska Native | 0.172 | 0.258 | No significant association |
| Native Hawaiian/Pacific Islander | 0.193 | 0.355 | No significant association |
| Multiple Races | -0.182 | 0.202 | No significant association |
| **Structural Factors** |  |  |  |
| **Rurality** (% of total state population) | 0.027 | 0.851 | No significant association |
| **Dermatologist Workforce** (count per State) | -0.374 | **0.032*** | Moderate negative correlation |
| **Location Quotient ‡** | 0.047 | 0.800 | No significant association |
| **Environmental Factors** |  |  |  |
| **UV Irradiance** (J/m², annual average) | -0.061 | 0.674 | No significant association |
| * Statistically significant values.  † Variables were drawn from the most recent publicly available sources, which varied in year due to data availability. Melanoma incidence and racial composition data are from 2021 (age-standardized estimates); UV irradiance represents annual averages from 2020; rural population percentage and dermatologist workforce data (counts and location quotient) are from 2023; and median age reflects 2022 estimates.  ‡ Location Quotient compares the concentration of dermatologists in a state to the national average (LQ > 1 indicates above-average density).  Note: This exploratory analysis did not apply corrections for multiple comparisons, and results should be interpreted accordingly. | | | |

**Limitations:**

We used covariate data from different years (e.g., UV from 2020, rurality and dermatologist data from 2023) due to data availability. This temporal mismatch may introduce minor bias, though these variables typically show limited year-to-year variation. Additionally, given the exploratory nature of this study, we did not apply corrections for multiple comparisons, which may increase the likelihood of type I errors in interpreting statistically significant correlations. Also, our findings may be subject to ecological fallacy, particularly regarding aggregate measures of UV exposure and dermatologist access, which may not reflect individual-level risk or service utilization.

**References**:

1. (KFF) KFF: Population Distribution by Race/Ethnicity. <https://www.kff.org/other/state-indicator/distribution-by-raceethnicity/?currentTimeframe=0&sortModel=%7B%22colId%22:%22Location%22,%22sort%22:%22asc%22%7D> (2023). Accessed 7/21/2025.

2. facts CRwas: Average Annual Sunshine by State. <https://www.currentresults.com/Weather/US/average-annual-state-sunshine.php> Accessed 7/21/2025.

3. Review WP: UV Index by State. <https://worldpopulationreview.com/state-rankings/uv-index-by-state> (2020). Accessed 7/21/2025.

4. Rankings AsH: Rural Population in United States. <https://www.americashealthrankings.org/explore/measures/pct_rural_b> (2023). Accessed 7/21/2025.

5. Statistics USBoL: Industry profile for Dermatologists. <https://www.bls.gov/oes/2023/may/oes291213.htm> (2023). Accessed 7/21/2025.
